# Supplementary material
Source: PubMed Central journal article supplement (PMC9483370)
Supplement: 11095_2022_3378_MOESM1_ESM.pdf [file 11095_2022_3378_MOESM1_ESM.pdf]

# **Novel 3D printed modular tablets containing multiple anti-viral drugs: A case of high precision drop-on-demand drug deposition**

Anqi Lu<sup>1</sup>, Jiaxiang Zhang<sup>1</sup>, Junhuang Jiang<sup>2</sup>, Yu Zhang<sup>1</sup>, Bhupendra R Giri<sup>1</sup>, Vineet R Kulkarni<sup>1</sup>, Niloofar Heshmati Aghda<sup>1</sup>, Jiawei Wang<sup>1</sup>, Mohammed Maniruzzaman<sup>1\*</sup>

<sup>1</sup>Pharmaceutical Engineering and 3D Printing (PharmE3D) Labs, Division of Molecular Pharmaceutics and Drug Delivery, College of Pharmacy, the University of Texas at Austin, Austin TX, 78712.

<sup>2</sup>Division of Molecular Pharmaceutics and Drug Delivery, College of Pharmacy, the University of Texas at Austin, Austin TX, 78712.

\*Corresponding Author: M Maniruzzaman ([m.maniruzzaman@austin.utexas.edu](mailto:m.maniruzzaman@austin.utexas.edu)), Office: +1 512 232 4743

## Supplementary Data:

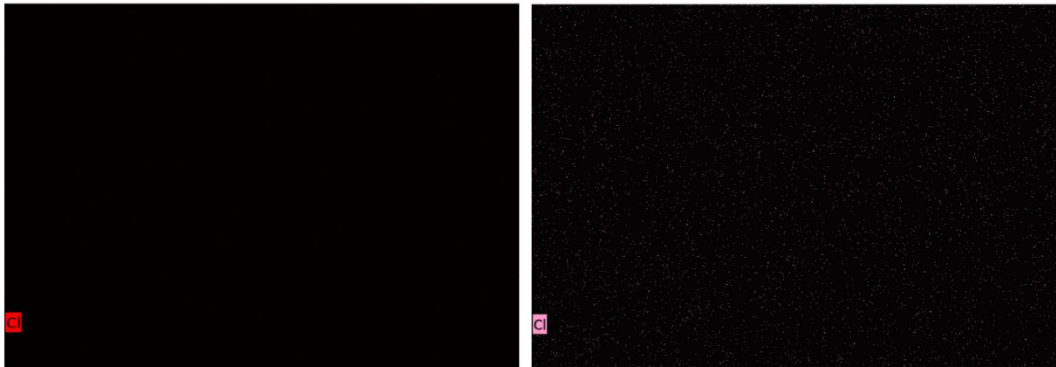

**Figure S1:** Size-optimized figure of the CI distribution. Left: Blank; Right: HCS tablet.

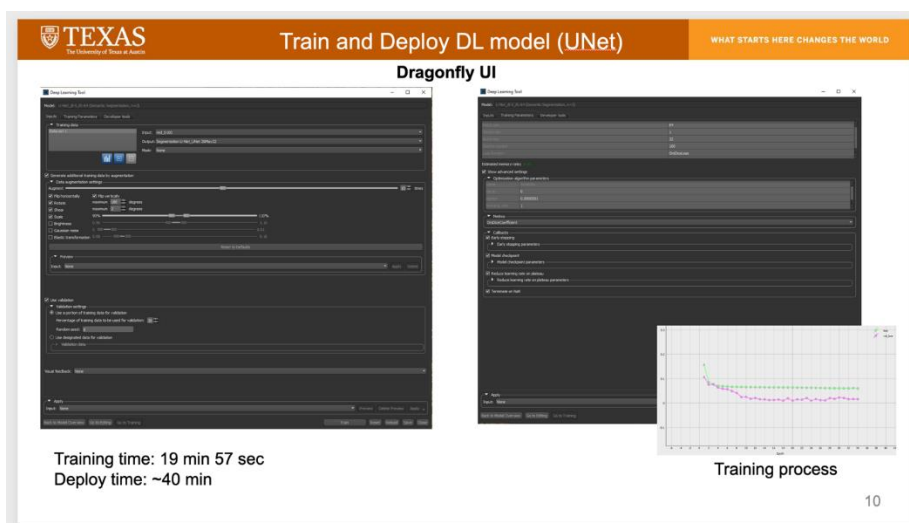

**Figure S2:** Screenshot of the model's method summary. [For the loss function and metrics, we used the default ones in the software (OrisDiceLoss & OrisDiceCoefficient)].

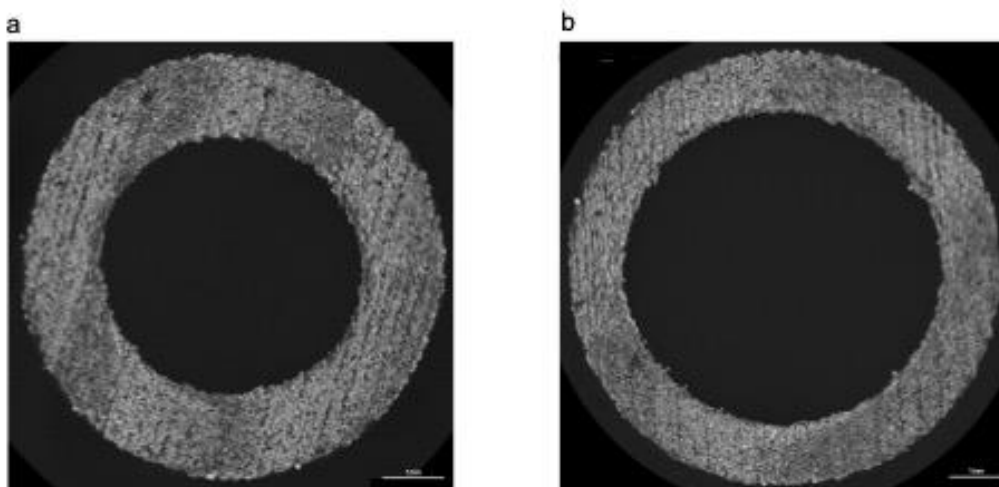

**Figure S3:** XRCT images of favipiravir (a) and ritonavir (b) 3D-printed tablets.

**Table S1.** *In Vitro* drug release data (n=3)

| Drugs       | Concentration<br>(mg/ml) | Dispersion<br>Volume<br>( $\mu$ l) | Total drug<br>( $\mu$ g) | Drug released<br>amount after 240<br>min ( $\mu$ g) | Drug released<br>ratio after 240<br>min (%) |
|-------------|--------------------------|------------------------------------|--------------------------|-----------------------------------------------------|---------------------------------------------|
| HCS         | 100                      | 44                                 | 4400                     | 1678.70 $\pm$ 144.58                                | 38.15 $\pm$ 3.29                            |
| Favipiravir | 8                        | 95                                 | 760                      | 567.96 $\pm$ 16.89                                  | 74.73 $\pm$ 2.22                            |
| Ritonavir   | 10                       | 110                                | 1100                     | 1016.19 $\pm$ 13.88                                 | 92.38 $\pm$ 1.26                            |

**Table S2.** Drug amount calculated by flow rate.

| Drugs       | Concentration<br>(mg/ml) | Dispersion<br>Time (s) | Flow rate<br>( $\mu$ l /s) | Dispersion<br>Volume ( $\mu$ l) | Calculated<br>total drug ( $\mu$ g) |
|-------------|--------------------------|------------------------|----------------------------|---------------------------------|-------------------------------------|
| HCS         | 100                      | 38                     | 1.19                       | 45.22                           | 4522                                |
| Favipiravir | 8                        | 37                     | 1.19                       | 44.03                           | 352.24                              |
| Ritonavir   | 10                       | 52                     | 1.19                       | 61.88                           | 618.8                               |

**Table S3.** Drug amount calculated by collected volume.

| Drugs       | Concentration<br>(mg/ml) | Dispersion<br>Volume<br>( $\mu$ l) | Total drug<br>( $\mu$ g) | Drug<br>loading (%) |
|-------------|--------------------------|------------------------------------|--------------------------|---------------------|
| HCS         | 100                      | 44                                 | 4400                     | 0.62                |
| Favipiravir | 8                        | 95                                 | 760                      | 0.11                |
| Ritonavir   | 10                       | 110                                | 1100                     | 0.16                |

**Table S4.** Drug content detected by UV method

| Drugs       | Concentration<br>(mg/ml) | Mass<br>(mg) | Total drug<br>(mg) | Drug<br>loading (%) |
|-------------|--------------------------|--------------|--------------------|---------------------|
| HCS         | 0.204                    | 144.056      | 2.05               | 0.29                |
| Favipiravir | 0.058                    | 229.583      | 0.58               | 0.08                |
| Ritonavir   | 0.19                     | 340.09       | 1.88               | 0.26                |

**Table S5.** Drug content detected by HPLC method

| Drugs       | Concentration<br>(mg/ml) | Volume<br>(ml) | Total drug<br>(mg) | Drug<br>loading (%) |
|-------------|--------------------------|----------------|--------------------|---------------------|
| HCS         | 0.097                    | 50             | 4.852              | 0.68                |
| Favipiravir | 0.079                    | 50             | 0.397              | 0.055               |
| Ritonavir   | 0.031                    | 50             | 1.574              | 0.22                |
